# Supplementary material
Source: ML conference proceedings conference paper supplement (https://proceedings.neurips.cc/paper_files/paper/2022/hash/d38653cdaa8e992549e1e9e1621610d7-Abstract.html)
Supplement: Supplementary file 1 [file d38653cdaa8e992549e1e9e1621610d7-Supplemental-Conference.pdf]

## Appendix of the paper: Optimal Weak to Strong Learning

### A Weak to strong learning

The following theorem is essentially a restatement of Theorem 1 from the main paper.

**Theorem A.1.** *Assume we are given access to a  $\gamma$ -weak learner for a  $0 < \gamma < 1/2$ , using base hypothesis set  $\mathcal{H} \subseteq \mathcal{X} \rightarrow \{-1, 1\}$  of VC-dimension  $d$ . Then there is a universal constant  $\alpha > 0$  and an algorithm  $\mathcal{A}$ , such that for every  $0 < \delta < 1$  and every distribution  $\mathcal{D}$  over  $\mathcal{X} \times \{-1, 1\}$ , it holds with probability at least  $1 - \delta$  over a set of  $m$  samples  $S \sim \mathcal{D}^m$ , that  $\mathcal{A}$  on  $S$  outputs a classifier  $h_S = \mathcal{A}(S) \in \mathcal{X} \rightarrow \{-1, 1\}$  with*

$$\mathcal{L}_{\mathcal{D}}(h_S) \leq \alpha \cdot \frac{d\gamma^{-2} + \ln(1/\delta)}{m}.$$

Theorem 1 of the main paper follows by setting  $\varepsilon = \mathcal{L}_{\mathcal{D}}(h_S)$  and solving for  $m$  and letting the label in the distribution  $\mathcal{D}$  be  $c(x)$  for every  $x \in \mathcal{X}$ . The algorithm that obtains the guarantees has been described in the main paper. We thus only present (again) the two algorithms (Algorithm 1 and Algorithm 2), as well as AdaBoost\*<sub>v</sub> (Algorithm A.1) by Rätsch et al. [20] that achieves almost optimal margins and is used in Algorithm 2.

In the remainder of the section, we prove that Algorithm 2 has the guarantees of Theorem A.1. The proof follows that of Hanneke [13] pretty much uneventfully, although carefully using that a generalization error of  $1/200$  suffices. For simplicity, we assume  $m$  is a power of 4. This can easily be ensured by rounding  $m$  down to the nearest power of 4 and ignoring all excess samples. This only affects the generalization bound by a constant factor. With  $m$  being a power of 4 we can observe from Algorithm 1 that the cardinalities of all recursively generated sets  $A_0$  (which are the input to the next level of the recursion) are also powers of 4. Hence we can ignore all roundings.

#### A.1 Proof of Optimal Strong Learning

Let  $C \subseteq \mathcal{X} \rightarrow \{-1, 1\}$  be a concept class and assume there is a  $\gamma$ -weak learner for  $C$  using hypothesis set  $\mathcal{H}$  of VC-dimension  $d$ . Let  $\mathcal{A}_v^*$  be an algorithm that on a sample  $S$  consistent with a concept  $c \in C$ , computes a voting classifier  $f \in \Delta(\mathcal{H})$  with  $yf(x) \geq \gamma/2$  for all  $(x, y) \in S$  and returns as its output hypothesis  $g(x) = \text{sign}(f(x))$ . We could e.g. let  $\mathcal{A}_v^*$  be AdaBoost\*<sub>v</sub>. For a sample  $S$ , we use the notation  $\mathcal{M}_\gamma(S)$  to denote the set of hypotheses  $g(x) = \text{sign}(f(x))$  for an  $f \in \Delta(\mathcal{H})$  satisfying  $yf(x) \geq \gamma$  for all  $(x, y) \in S$ . The set  $\mathcal{M}_\gamma(S)$  is thus the set of all voting classifiers obtained by taking the sign of a voter that has margins at least  $\gamma$  on all samples in  $S$ . By definition, the output hypothesis  $g$  of  $\mathcal{A}_v^*$  on a set of samples  $S$  always lies in  $\mathcal{M}_{\gamma/2}(S)$ .

Let  $c \in C$  be an unknown concept in  $C$  and let  $\mathcal{D}$  be an arbitrary distribution over  $\mathcal{X}$ . Let  $S = \{(x_i, c(x_i))\}_{i=1}^m \in (\mathcal{X} \times \{-1, 1\})^m$  be a set of  $m$  samples with each  $x_i$  an i.i.d. sample from  $\mathcal{D}$ . Let  $S_{1:k}$  denote the first  $k$  samples of  $S$ . Let  $c' \geq 4$  be a constant to be determined later. We will prove by induction that for every  $m' \in \mathbb{N}$  that is a power of 4, for every  $\delta' \in (0, 1)$ , and every finite sequence  $B'$  of samples in  $\mathcal{X} \times \{-1, 1\}$  with  $y_i = c(x_i)$  for each  $(x_i, y_i) \in B'$ , with probability at least  $1 - \delta'$ , the classifier

$$\hat{h}_{m', B'} = \text{sign} \left( \sum_{C_i \in \text{Sub-Sample}(S_{1:m'}, B')} \mathcal{A}_v^*(C_i) \right)$$

satisfies

$$\mathcal{L}_{\mathcal{D}}(\hat{h}_{m', B'}) \leq \frac{c'}{m'} \left( d\gamma^{-2} + \ln(1/\delta') \right). \quad (3)$$

The conclusion of Theorem A.1 follows by letting  $B' = \emptyset$  and  $m' = m$  (and recalling that we assume  $m$  is a power of 4). Thus what remains is to give the inductive proof.

As the base case, consider any  $m' \in \mathbb{N}$  with  $m' \leq c'$  and  $m'$  a power of 4. In this case, the bound  $c'(d\gamma^{-2} + \ln(1/\delta'))/m'$  is at least  $d\gamma^{-2} \geq 1$  and  $\mathcal{L}_{\mathcal{D}}(\hat{h}_{m', B'}) \leq 1$  obviously holds.

For the inductive step, take as inductive hypothesis that, for some  $m \in \mathbb{N}$  with  $m > c'$  and  $m$  a power of 4, it holds for all  $m' \in \mathbb{N}$  with  $m' < m$  and  $m'$  a power of 4, that for every  $\delta' \in (0, 1)$  and every

---

**Algorithm A.1:** AdaBoost $^*$  [20]

---

**Input:** training set  $S = \{(x_1, y_1), \dots, (x_m, y_m)\}$ number of rounds  $T$ desired accuracy  $\nu$ **Result:** An ensemble hypothesis  $H_{\text{out}}$  with almost optimal margins

```
1  $\mathcal{D}^{(1)} \leftarrow \left(\frac{1}{m}, \dots, \frac{1}{m}\right)$  // uniform initialization of  $\mathcal{D}$ 
2 for  $t \in \{1, \dots, T\}$  do
3    $h_t \leftarrow \text{WL}(\mathcal{D}^{(t)}, S)$  // invoke weak learner
4    $\gamma_t \leftarrow \sum_{i=1}^m \mathcal{D}_i^{(t)} y_i h_t(x_i)$  // average margin of  $h_t$ 
5   if  $|\gamma_t| = 1$  then
6     /*  $h_t$  is consistent  $\Rightarrow$  taking only  $h_t$  as ‘ensemble’ maximizes the margin */
7      $w_1 \leftarrow \text{sign}(\gamma_t), \quad h_1 \leftarrow h_t, \quad T \leftarrow 1$ 
8     break
9    $\gamma_t^{\min} \leftarrow \min_{r \in [t]} \gamma_r$  // update assumed advantage
10   $\rho_t^{\min} \leftarrow \gamma_t^{\min} - \nu$ 
11   $w_t = \frac{1}{2} \ln \frac{1+\gamma_t}{1-\gamma_t} - \frac{1}{2} \ln \frac{1+\rho_t}{1-\rho_t}$  // weight for the current hypothesis
12  for  $i \in \{1, \dots, m\}$  do
13     $\mathcal{D}_i^{(t+1)} \leftarrow \frac{\mathcal{D}_i^{(t)} \exp(-w_t y_i h_t(x_i))}{\sum_{j=1}^m \mathcal{D}_j^{(t)} \exp(-w_t y_j h_t(x_j))}$  // update  $\mathcal{D}$ 
14 return  $f_{\text{out}}(x) = \frac{1}{\sum_{i=1}^T |w_i|} \sum_{t=1}^T w_t h_t(x)$  // (normalized) weighted majority vote
```

---

finite sequence  $B'$  of samples in  $\mathcal{X} \times \{-1, 1\}$  with  $y_i = c(x_i)$  for each  $(x_i, y_i) \in B'$ , with probability at least  $1 - \delta'$ , Eq. (3) holds. We need to prove that the inductive hypothesis also holds for  $m' = m$ .

Fix a  $\delta \in (0, 1)$  and any finite sequence  $B$  of points in  $\mathcal{X} \times \{-1, 1\}$  with  $y_i = c(x_i)$  for each  $(x_i, y_i) \in B$ . Since  $m > c' \geq 4$ , we have that  $\text{Sub-Sample}(S_{1:m}, B)$  returns in Step 5 of Algorithm 1. Let  $A_0, A_1, A_2, A_3$  be as defined in Step 4 of Algorithm 1. Also define  $B_1 = A_2 \cup A_3 \cup B$ ,  $B_2 = A_1 \cup A_3 \cup B$ ,  $B_3 = A_1 \cup A_2 \cup B$ , and for each  $i \in \{1, 2, 3\}$ , denote

$$h_i = \text{sign} \left( \sum_{C_i \in \text{Sub-Sample}(A_0, B_i)} \mathcal{A}_\nu^*(C_i) \right).$$

Note that the  $h_i$ 's correspond to the majority vote classifiers trained on the sub-samples of the three recursive calls in Algorithm 1. Moreover, notice that  $h_i = \hat{h}_{m/4, B_i}$ . Therefore, the inductive hypothesis may be used on  $h_1, h_2, h_3$  to conclude that for each  $i \in \{1, 2, 3\}$ , there is an event  $E_i$  of probability at least  $1 - \delta/9$ , on which

$$\mathcal{L}_{\mathcal{D}}(h_i) \leq \frac{c'}{|A_0|} \left( d\gamma^{-2} + \ln(9/\delta) \right) \leq \frac{4c'}{m} \left( d\gamma^{-2} + \ln(1/\delta) + 3 \right) \leq \frac{12c'}{m} \left( d\gamma^{-2} + \ln(1/\delta) \right). \quad (4)$$

Here we chose the probability  $1 - \delta/9$  in order to perform a union bound in the end of the induction step which is possible since the inductive hypothesis holds for every  $\delta'$ . Next, define  $\text{Err}(h_i)$  as the set of points  $x \in \mathcal{X}$  for which  $h_i(x) \neq c(x)$ . Now fix an  $i \in \{1, 2, 3\}$  and denote by  $\{(Z_{i,1}, c(Z_{i,1})), \dots, (Z_{i,N_i}, c(Z_{i,N_i}))\} = A_i \cap (\text{Err}(h_i) \times \{-1, 1\})$ , where  $N_i = |A_i \cap (\text{Err}(h_i) \times \{-1, 1\})|$ . Said in words, the set  $\{(Z_{i,j}, c(Z_{i,j}))\}_{j=1}^{N_i}$  is the subset of samples in  $A_i$  on which  $h_i$  makes a mistake. Notice that  $h_i$  is not trained on any samples from  $A_i$  ( $B_i$  excludes  $A_i$ ), hence  $h_i$  and  $A_i$  are independent. Therefore, given  $h_i$  and  $N_i$ , the samples  $Z_{i,1}, \dots, Z_{i,N_i}$  are conditionally independent samples with distribution  $\mathcal{D}(\cdot | \text{Err}(h_i))$  (provided  $N_i > 0$ ). From Theorem 6 in the main paper, we get that there is an event  $E'_i$  of probability at least  $1 - \delta/9$ , such that if  $N_i \geq c''(d\gamma^{-2} + \ln(1/\delta))$ , then every  $h \in \mathcal{M}_{\gamma/2}(\{(Z_{i,j}, c(Z_{i,j}))\}_{j=1}^{N_i})$  satisfies

$$\mathcal{L}_{\mathcal{D}(\cdot | \text{Err}(h_i))}(h) \leq \frac{1}{200}.$$

Note that this is a key step where our proof differs from Hanneke's original proof since we exploit that a bound of  $\frac{1}{200}$  on the generalization error suffices for the rest of the proof. We continue by observing

that for each  $j \in \{1, 2, 3\} \setminus \{i\}$ , the set  $B_j$  contains  $A_i$  and this remains the case in all recursive calls of  $\text{Sub-Sample}(A_0, B_i)$ . Thus for  $\{C_1, \dots, C_k\} = \text{Sub-Sample}(A_0, B_j)$ , it holds for all  $C_k$  that  $\mathcal{A}_v^*(C_k) \in \mathcal{M}_{\gamma/2}(B_j) \Rightarrow \mathcal{A}_v^*(C_k) \in \mathcal{M}_{\gamma/2}(A_0) \Rightarrow \mathcal{A}_v^*(C_k) \in \mathcal{M}_{\gamma/2}(\{(Z_{i,j}, c(Z_{i,j}))\}_{j=1}^{N_i})$ . Thus on the event  $E'_i$  defined above, if  $N_i > c''(d\gamma^{-2} + \ln(1/\delta))$ , then it holds for all  $j \in \{1, 2, 3\} \setminus \{i\}$  and all  $C_k \in \text{Sub-Sample}(A_0, B_j)$ , that the hypothesis  $h = \mathcal{A}_v^*(C_k)$  satisfies

$$\begin{aligned} \Pr_{x \sim \mathcal{D}} [h_i(x) \neq c(x) \wedge h(x) \neq c(x)] &= \mathcal{L}_{\mathcal{D}}(h_i) \cdot \mathcal{L}_{\mathcal{D}(\cdot | \text{Err}(h_i))}(h) \\ &\leq \frac{1}{200} \mathcal{L}_{\mathcal{D}}(h_i). \end{aligned}$$

Assume now that  $\mathcal{L}_{\mathcal{D}}(h_i) \geq ((10/7)c''(d\gamma^{-2} + \ln(1/\delta)) + 23 \ln(9/\delta))/(m/4) \geq 23 \ln(9/\delta)/|A_i|$ .

Using that  $h_i$  and  $A_i$  are independent, it follows by a Chernoff bound that

$$\begin{aligned} \Pr [N_i \geq (7/10)\mathcal{L}_{\mathcal{D}}(h_i)|A_i|] &\geq 1 - \exp(-(3/10)^2 \mathcal{L}_{\mathcal{D}}(h_i)|A_i|/2) \\ &\geq 1 - \exp(-(3/10)^2 \cdot 23 \ln(9/\delta)/2) \\ &> 1 - \delta/9. \end{aligned}$$

Thus there is an event  $E''_i$  of probability at least  $1 - \delta/9$ , on which, if

$$\mathcal{L}_{\mathcal{D}}(h_i) \geq \frac{(10/7)c''(d\gamma^{-2} + \ln(1/\delta)) + 23 \ln(9/\delta)}{m/4}$$

then

$$\begin{aligned} N_i &\geq (7/10)\mathcal{L}_{\mathcal{D}}(h_i)|A_i| \\ &= (7/10)\mathcal{L}_{\mathcal{D}}(h_i)m/4 \\ &\geq c''(d\gamma^{-2} + \ln(1/\delta)). \end{aligned}$$

Combining it all, we have that on the event  $E_i \cap E'_i \cap E''_i$ , which occurs with probability at least  $1 - \delta/3$ , if  $\mathcal{L}_{\mathcal{D}}(h_i) \geq ((10/7)c''(d\gamma^{-2} + \ln(1/\delta)) + 23 \ln(9/\delta))/(m/4)$ , then every  $h = \mathcal{A}_v^*(C_k)$  for a  $C_k \in \text{Sub-Sample}(A_0, B_j)$  with  $j \neq i$  has:

$$\Pr_{x \sim \mathcal{D}} [h_i(x) \neq c(x) \wedge h(x) \neq c(x)] \leq \frac{1}{200} \mathcal{L}_{\mathcal{D}}(h_i)$$

By Eq. (4), this is at most

$$\begin{aligned} \Pr_{x \sim \mathcal{D}} [h_i(x) \neq c(x) \wedge h(x) \neq c(x)] &\leq \frac{1}{200} \cdot \frac{12c'}{m} (d\gamma^{-2} + \ln(1/\delta)) \\ &\leq \frac{c'}{16m} (d\gamma^{-2} + \ln(1/\delta)). \end{aligned}$$

On the other hand, if  $\mathcal{L}_{\mathcal{D}}(h_i) < (c''(d\gamma^{-2} + \ln(1/\delta)) + 23 \ln(9/\delta))/(m/4)$ , then

$$\begin{aligned} \Pr_{x \sim \mathcal{D}} [h_i(x) \neq c(x) \wedge h(x) \neq c(x)] &\leq \mathcal{L}_{\mathcal{D}}(h_i) \\ &\leq (c''(d\gamma^{-2} + \ln(1/\delta)) + 23 \ln(9/\delta))/(m/4) \\ &\leq 4c''(d\gamma^{-2} + 24 \ln(1/\delta) + 23 \ln 9)/m \end{aligned}$$

Using that  $23 \cdot \ln 9 < 51 \leq 51d\gamma^{-2}$ , the above is at most  $204c''(d\gamma^{-2} + \ln(1/\delta))/m$ . Fixing the constant  $c'$  to  $c' \geq (16 \cdot 204)c''$ , this is at most

$$\frac{c'}{16m} (d\gamma^{-2} + \ln(1/\delta)).$$

We conclude that on the event  $\bigcap_{i=1,2,3} \{E_i \cap E'_i \cap E''_i\}$ , which occurs with probability at least  $1 - \delta$  by a union bound, it holds for all  $i$  and all  $C_k \in \text{Sub-Sample}(A_0, B_j)$  with  $j \neq i$  that the hypothesis  $h = \mathcal{A}_v^*(C_k)$  satisfies:

$$\Pr_{x \sim \mathcal{D}} [h_i(x) \neq c(x) \wedge h(x) \neq c(x)] \leq \frac{c'}{16m} (d\gamma^{-2} + \ln(1/\delta)).$$

Now consider an  $x$  on which  $\hat{h}_{m,B}$  errs. On such an  $x$ , the majority among the classifiers

$$\bigcup_{C_i \in \text{Sub-Sample}(S_{1,m}, B)} \{\mathcal{A}_v^*(C_i)\} = \bigcup_{i=1,2,3} \bigcup_{C_k \in \text{Sub-Sample}(S_{1,m/4}, B_i)} \{\mathcal{A}_v^*(C_k)\}$$

errs. For the majority to err, there must be an  $i \in \{1, 2, 3\}$  for which the majority of

$$\bigcup_{C_k \in \text{Sub-Sample}(S_{1,m/4}, B_i)} \{\mathcal{A}_v^*(C_k)\}$$

errs. This is equivalent to  $h_i(x) \neq c(x)$ . Furthermore, even when all of the classifiers in

$$\bigcup_{C_k \in \text{Sub-Sample}(S_{1,m/4}, B_i)} \{\mathcal{A}_v^*(C_k)\}$$

err, there still must be another (1/6)-fraction of all the classifiers

$$\bigcup_{i=1,2,3} \bigcup_{C_k \in \text{Sub-Sample}(S_{1,m/4}, B_i)} \{\mathcal{A}_v^*(C_k)\}$$

that err. This follows since each of the three recursive calls in *Sub-Sample* generated equally many classifiers/samples. It follows that if we pick a uniform random  $i \in \{1, 2, 3\}$  and a uniform random hypothesis  $h$  in

$$\bigcup_{j \in \{1,2,3\} \setminus \{i\}} \bigcup_{C_k \in \text{Sub-Sample}(S_{1,m/4}, B_j)} \{\mathcal{A}_v^*(C_k)\}$$

then with probability at least  $(1/3)(1/6)(3/2) = 1/12$ , we have that  $h_i(x) \neq c(x) \wedge h(x) \neq c(x)$ . It follows by linearity of expectation that on the event  $\bigcap_{i=1,2,3} \{E_i \cap E'_i \cap E''_i\}$ , we have:

$$\mathcal{L}_{\mathcal{D}}(\hat{h}_{m,B}) \leq 12 \cdot \frac{c'}{16m} \left( d\gamma^{-2} + \ln(1/\delta) \right) < \frac{c'}{m} \left( d\gamma^{-2} + \ln(1/\delta) \right).$$

This completes the inductive proof and shows Theorem A.1.

## B Lower bound

In this section, we prove the following lower bound which directly implies Theorem 2 from the main paper:

**Theorem B.1.** *There is a universal constant  $\alpha > 0$  such that for all integers  $d \in \mathbb{N}$  and every  $2^{-d} < \gamma < 1/80$ , there is a finite set  $X$ , a concept class  $C \subset X \rightarrow \{-1, 1\}$  and a hypothesis set  $\mathcal{H} \subseteq X \rightarrow \{-1, 1\}$  of VC-dimension at most  $d$ , such that for every integer  $m \in \mathbb{N}$  and  $0 < \delta < 1/3$ , there is a distribution  $\mathcal{D}$  over  $X$  such that the following holds:*

1. *For every  $c \in C$  and every distribution  $\mathcal{D}'$  over  $X$ , there is an  $h \in \mathcal{H}$  with*

$$\Pr_{x \sim \mathcal{D}'} [h(x) \neq c(x)] \leq 1/2 - \gamma.$$

2. *For any algorithm  $\mathcal{A}$ , there is a concept  $c \in C$  such that with probability at least  $\delta$  over a set of  $m$  samples  $S \sim \mathcal{D}^m$ , the classifier  $\mathcal{A}(S) \in X \rightarrow \{-1, 1\}$  produced by  $\mathcal{A}$  on  $S$  and  $c(S)$  must have*

$$\mathcal{L}_{\mathcal{D}}(\mathcal{A}(S)) \geq \alpha \cdot \frac{d\gamma^{-2} + \ln(1/\delta)}{m}.$$

Theorem B.1 immediately implies Theorem 2 by solving the equation in the second statement for  $\varepsilon = \mathcal{L}_{\mathcal{D}}(\mathcal{A}(S))$ .

The proof of the term  $\ln(1/\delta)/m$  in the lower bound follows from previous work. In particular, we could let  $C = \mathcal{H}$  and invoke the tight lower bounds for PAC-learning in the realizable setting [5]. Thus, we focus on  $\delta = 1/3$  and only need to prove that the loss of  $\mathcal{A}(S)$  is at least  $\alpha d\gamma^{-2}/m$  with probability  $1/3$  over  $S$ .

For the proof, we make use of the following lemma by Grønlund et al. [9] to construct the ‘hard’ hypothesis set  $\mathcal{H}$  and concept class  $C$ :

**Lemma B.1** (Grønlund et al. [9]). *For every  $\gamma \in (0, 1/40)$ ,  $\delta \in (0, 1)$  and integers  $k \leq u$ , there exists a distribution  $\mu = \mu(u, d, \gamma, \delta)$  over a hypothesis set  $\mathcal{H} \subset \mathcal{X} \rightarrow \{-1, 1\}$ , where  $\mathcal{X}$  is a set of size  $u$ , such that the following holds.*

1. *For all  $\mathcal{H} \in \text{supp}(\mu)$ , we have  $|\mathcal{H}| = N$ ; and*
2. *For every labeling  $\ell \in \{-1, 1\}^u$ , if no more than  $k$  points  $x \in \mathcal{X}$  satisfy  $\ell(x) = -1$ , then*

$$\Pr_{\mathcal{H} \sim \mu} [\exists f \in \Delta(\mathcal{H}) : \forall x \in \mathcal{X} : \ell(x)f(x) \geq \gamma] \geq 1 - \delta.$$

$$\text{where } N = \Theta(\gamma^{-2} \ln u \ln(\gamma^{-2} \ln u \delta^{-1}) e^{\Theta(\gamma^2 k)}).$$

To prove Theorem B.1 for a given  $\gamma \in (2^{-d}, 1/80)$  and  $m, d \in \mathbb{N}$ , let  $u = k$  for a  $u$  to be determined. Invoke Lemma B.1 with  $\delta = 1/2$  and  $\gamma' = 2\gamma$  to conclude that there exists a hypothesis set  $\mathcal{H}$  such that among all labelings  $\ell \in \{-1, 1\}^u$ , at least half of them satisfy:

$$\exists f \in \Delta(\mathcal{H}) : \forall x \in \mathcal{X} : \ell(x)f(x) \geq 2\gamma.$$

Moreover, we have  $N = |\mathcal{H}| = \Theta(\gamma^{-2} \ln u \ln(\gamma^{-2} \ln u) e^{\Theta(\gamma^2 u)})$ . Let the concept class  $\mathcal{C}$  be the set of such labelings.

For the given VC-dimension  $d$ , we need to bound the VC-dimension of  $\mathcal{H}$  by  $d$ . For this, note that the VC-dimension is bounded by  $\lg |\mathcal{H}| = \Theta(\gamma^2 u) + \lg(\gamma^{-2} \lg u)$ . Using that  $\gamma \geq 2^{-d}$ , this is at most  $\Theta(\gamma^2 u + d + \lg \lg u)$ . We thus choose  $u = \Theta(\gamma^{-2} d)$  which implies the claimed VC-dimension of  $\mathcal{H}$ .

Next, we have to argue that any concept  $c \in \mathcal{C}$  can be  $\gamma$ -weakly learned from  $\mathcal{H}$ . That is, the first statement of Theorem B.1 holds for  $\mathcal{H}, \mathcal{C}$ . To see this, we must show that for every distribution  $\mathcal{D}$  over  $\mathcal{X}$ , there is a hypothesis  $h \in \mathcal{H}$  such that  $\Pr_{x \sim \mathcal{D}}[h(x) = c(x)] \geq 1/2 + \gamma$ . To argue that this is indeed the case, let  $f \in \Delta(\mathcal{H})$  satisfy  $\forall x \in \mathcal{X} : c(x)f(x) \geq 2\gamma$ . Such an  $f$  exists by definition of  $\mathcal{C}$ . Then,  $\mathbb{E}_{x \sim \mathcal{D}}[c(x)f(x)] \geq 2\gamma$ . Since  $f(x)$  is a convex combination of hypotheses from  $\mathcal{H}$ , it follows that there is a hypothesis  $h \in \mathcal{H}$  also satisfying  $\mathbb{E}_{x \sim \mathcal{D}}[c(x)h(x)] \geq 2\gamma$ . But

$$\begin{aligned} \mathbb{E}_{x \sim \mathcal{D}} [c(x)h(x)] &= \sum_{x \in \mathcal{X}} \mathcal{D}(x) c(x)h(x) \\ &= \sum_{x \in \mathcal{X} : c(x)=h(x)} \mathcal{D}(x) - \sum_{x \in \mathcal{X} : c(x) \neq h(x)} \mathcal{D}(x) \\ &= \Pr_{x \sim \mathcal{D}} [c(x) = h(x)] - \Pr_{x \sim \mathcal{D}} [c(x) \neq h(x)] \\ &= \Pr_{x \sim \mathcal{D}} [c(x) = h(x)] - (1 - \Pr_{x \sim \mathcal{D}} [c(x) = h(x)]) \\ &= 2 \Pr_{x \sim \mathcal{D}} [c(x) = h(x)] - 1. \end{aligned}$$

Hence,  $2 \cdot \Pr_{x \sim \mathcal{D}} [c(x) = h(x)] - 1 \geq 2\gamma \implies \Pr_{x \sim \mathcal{D}} [c(x) = h(x)] \geq 1/2 + \gamma$  as claimed.

We have thus constructed  $\mathcal{H}$  and  $\mathcal{C}$  satisfying the first statement of Theorem B.1, where  $\mathcal{C}$  contains at least half of all possible labelings of the points  $\mathcal{X} = \{x_1, \dots, x_u\}$  with  $u = \Theta(\gamma^{-2} d)$ . For the remainder of the proof, we assume  $u$  is at least some large constant, which is true for  $\gamma$  small enough.

What remains is to establish the second statement of Theorem B.1. For this, we first define the hard distribution  $\mathcal{D}$  over  $\mathcal{X}$ . The distribution  $\mathcal{D}$  returns the point  $x_1$  with probability  $1 - (u-1)/4m$  and with the remaining probability  $(u-1)/4m$  it returns a uniform random sample  $x_i$  among  $x_2, \dots, x_u$ . Also, let  $c$  be a uniform random concept drawn from  $\mathcal{C}$ .

Let  $\mathcal{A}$  be any (possibly randomized) learning algorithm that on a set of samples  $S$  from  $\mathcal{X}$  and a labeling  $\ell(S)$  of  $S$  that is consistent with at least one concept  $c \in \mathcal{C}$  (i.e.  $\ell(S) = c(S)$ ), outputs a hypothesis  $h_{S, \ell(S)}$  in  $\mathcal{X} \rightarrow \{-1, 1\}$ . The algorithm  $\mathcal{A}$  is not constrained to output a hypothesis from  $\Delta(\mathcal{H})$  or  $\mathcal{H}$ , but instead may output any desirable hypothesis in  $\mathcal{X} \rightarrow \{-1, 1\}$ , using the full knowledge of  $\mathcal{C}$ ,  $\ell(S)$ ,  $\mathcal{H}$  and the promise that  $c \in \mathcal{C}$ . Our goal is to show that

$$\mathbb{E}_{c \sim \mathcal{C}} \left[ \Pr_{S \sim \mathcal{D}^m} \left[ \Pr_{x \sim \mathcal{D}} [h_{S, c(S)}(x) \neq c(x)] \geq \alpha' \frac{d\gamma^{-2}}{m} \right] \right] \geq 1/3 \quad (5)$$

where  $c \sim C$  denotes the uniform random choice of  $c$ . Notice that if this is the case, there must exist a concept  $c$  for which

$$\Pr_{S \sim \mathcal{D}^m} \left[ \Pr_{x \sim \mathcal{D}} [h_{S,c(S)}(x) \neq c(x)] \geq \alpha' \frac{d\gamma^{-2}}{m} \right] \geq 1/3.$$

To establish Eq. (5), we start by observing that for any randomized algorithm  $\mathcal{A}$ , there is a deterministic algorithm  $\mathcal{A}'$  obtaining a smaller than or equal value of the left hand side of Eq. (5) (by Yao's principle). Thus, we assume from here on that  $\mathcal{A}$  is deterministic.

The main idea in our proof is to first show that conditioned on the set  $S$  and label  $c(S)$ , the concept  $c$  is still largely unknown. We formally measure this by arguing that the binary Shannon entropy of  $c$  is large conditioned on  $S$  and  $c(S)$ . Next, we argue that if a learning algorithm often manages to produce an accurate hypothesis from  $S$  and  $c(S)$ , then that reveals a lot of information about  $c$ , i.e. the entropy of  $c$  is small conditioned on  $S$  and  $c(S)$ . This contradicts the first statement and thus the algorithm cannot produce an accurate hypothesis. We now proceed with the two steps.

**Large Conditional Entropy.** Consider the binary Shannon entropy of the uniform random  $c$  conditioned on  $S$  and  $c(S)$ , denoted  $H(c \mid S, c(S))$ . We know that  $H(c) = \lg |C| \geq \lg(2^u/2) = u - 1$ . The random variable  $c$  is independent of  $S$ , hence  $H(c \mid S) = H(c)$ . We therefore have  $H(c \mid S, c(S)) \geq H(c \mid S) - H(c(S) \mid S) = u - 1 - H(c(S) \mid S)$ . For a fixed  $s \in \mathcal{X}^m$ , let  $p_s = \Pr_{S \sim \mathcal{D}^m} [S = s]$ . Then  $H(c(S) \mid S) = \sum_{s \in \mathcal{X}^m} p_s H(c(S) \mid S = s) \leq \sum_{s \in \mathcal{X}^m} p_s |s|$ , where the last step follows from the fact that, conditioned on  $s$ , the labeling  $c(s)$  consists of  $|s|$  signs. Note that the size of the set  $|s|$  is possibly smaller than  $m$  due to repetitions.

Now notice that  $\Pr[|S| > u/3]$  is exponentially small in  $u$  since each of the  $m$  samples from  $\mathcal{D}$  is among  $x_2, \dots, x_u$  with probability only  $(u-1)/(4m)$ . Therefore, we get  $H(c(S) \mid S) \leq u/3 + \exp(-\Omega(u))u \leq u/2 - 1$ . It follows that

$$H(c \mid S, c(S)) \geq u - 1 - (u/2 - 1) = u/2. \quad (6)$$

**Accuracy Implies Low Entropy.** Now assume that  $h_{S,c(S)}$  is such that  $\Pr_{x \sim \mathcal{D}} [h_{S,c(S)}(x) \neq c(x)] < \alpha' d\gamma^{-2}/m$  for a sufficiently small constant  $\alpha'$ . Any point  $x_i$  where  $c(x_i)$  disagrees with  $h_{S,c(S)}(x_i)$  adds at least  $1/(4m)$  to  $\Pr_{x \sim \mathcal{D}} [h_{S,c(S)}(x) \neq c(x)]$  (the point  $x_1$  would add more), hence  $h_{S,c(S)}$  makes a mistake on at most  $\alpha' d\gamma^{-2}/m \cdot (4m) = 4\alpha' d\gamma^{-2}$  points. Recalling that  $u = \Theta(d\gamma^{-2})$ , we get that for  $\alpha'$  small enough, this is less than  $u/100$ . Thus, conditioned on  $\Pr_{x \sim \mathcal{D}} [h_{S,c(S)}(x) \neq c(x)] < \alpha' d\gamma^{-2}/m$  and  $h_{S,c(S)}$ , we get that the entropy of the concept  $c$  is no more than  $\lg \left( \sum_{i=0}^{u/100} \binom{u}{i} \right)$  since  $c$  is within a Hamming ball of radius  $u/100$  from  $h_{S,c(S)}$ . Now  $\sum_{i=0}^{u/100} \binom{u}{i} \leq 2^{H_b(1/100)u}$ , where  $H_b$  is the binary entropy of a Bernoulli random variable with success probability  $1/100$ . Numerical calculations give  $H_b(1/100) = (1/100) \lg_2(100) + (99/100) \lg_2(100/99) < 0.09$ . Thus

$$H\left(c \mid h_{S,c(S)}, \Pr_{x \sim \mathcal{D}} [h_{S,c(S)}(x) \neq c(x)] < \alpha' d\gamma^{-2}/m\right) \leq 0.09u. \quad (7)$$

Now let  $X_{S,c}$  be an indicator random variable for the event that  $\Pr_{x \sim \mathcal{D}} [h_{S,c(S)}(x) \neq c(x)] < \alpha' d\gamma^{-2}/m$ . Then  $H(c \mid S, c(S)) \leq H(c \mid S, c(S), h_{S,c(S)}, X_{S,c}) + H(X_{S,c})$ . Here we remark that we add  $h_{S,c(S)}$  in the conditioning for free since it depends only on  $S$  and  $c(S)$ . Adding  $X_{S,c}$  costs at most its entropy which satisfies  $H(X_{S,c}) \leq 1$ . Since removing variables that we condition on only increases entropy, we get  $H(c \mid S, c(S)) \leq H(c \mid h_{S,c(S)}, X_{S,c}) + 1$ . Now observe that  $H(c \mid h_{S,c(S)}, X_{S,c}) = \Pr[X_{S,c} = 1]H(c \mid h_{S,c(S)}, X_{S,c} = 1) + \Pr[X_{S,c} = 0]H(c \mid h_{S,c(S)}, X_{S,c} = 0)$ . The latter entropy we simply bound by  $u$  and the former is bounded by  $0.09u$  by Eq. (7). Thus  $H(c \mid S, c(S)) \leq 1 + \Pr[X_{S,c} = 1]0.09u + (1 - \Pr[X_{S,c} = 1])u$ .

**Combining the Bounds.** Combining the above with Eq. (6) we conclude that

$$1 + \Pr[X_{S,c} = 1]0.09u + (1 - \Pr[X_{S,c} = 1])u \geq u/2.$$

It follows that  $\Pr[X_{S,c} = 1] \leq 2/3$ . This completes the proof since

$$\mathbb{E}_{c \sim C} \left[ \Pr_{S \sim \mathcal{D}^m} \left[ \Pr_{x \sim \mathcal{D}} [h_{S,c(S)}(x) \neq c(x)] \geq \alpha' \frac{d\gamma^{-2}}{m} \right] \right] = \mathbb{E}_{c \sim C} \left[ \mathbb{E}_{S \sim \mathcal{D}^m} [(1 - X_{S,c})] \right] = 1 - \Pr[X_{S,c} = 1]$$

and thus

$$\mathbb{E}_{c \sim C} \left[ \Pr_{S \sim \mathcal{D}^m} \left[ \Pr_{x \sim \mathcal{D}} [h_{S,c(S)}(x) \neq c(x)] \geq \alpha' \frac{dy^{-2}}{m} \right] \right] \geq \frac{1}{3}.$$

This finishes the proof of Theorem B.1.

## C Proofs for the margin-based generalization bound for voting classifiers

This section covers the proofs of all lemmas needed to show the generalization bound for voting classifiers with large margins (Theorem 4 in the main paper) that did not fit into the main text.

### C.1 Proofs of key properties of $\mathcal{D}_{f,t}$

First, we present the proofs of Lemma 1, 2, and 3 from the main paper covering different properties of the distribution  $\mathcal{D}_{f,t}$ .

**Restatement of Lemma 1.** For any  $x \in \mathcal{X}$ , any  $f \in \Delta(\mathcal{H})$  and any  $\mu > 0$ :

$$\Pr_{g \sim \mathcal{D}_{f,t}} [ |f(x) - g(x)| \geq \mu ] < 5 \exp(-\mu^2 t / 32).$$

*Proof.* This lemma follows using standard concentration inequalities: In the first step of sampling  $g$  from  $\mathcal{D}_{f,t}$ , where we draw  $t$  i.i.d. hypotheses, it follows from Hoeffding's inequality that the hypothesis  $g'(x) = (1/t) \sum_{i=1}^t h'_i(x)$  satisfies

$$\Pr_{g'} [ |f(x) - g'(x)| \geq \mu/2 ] \leq 2 \exp(-2(\mu/2)^2 t^2 / (4t)) = 2 \exp(-\mu^2 t / 8).$$

In the second step, we first get by a Chernoff bound that  $\Pr[t' < t/4] < \exp(-t/16)$ . Secondly, let us condition on any fixed value of  $t'$  that is at least  $t/4$ . Then  $h_1, \dots, h_{t'}$  is a uniform sample without replacement from  $h'_1, \dots, h'_t$ . It follows by a Hoeffding bound without replacement that

$$\Pr [ |g(x) - g'(x)| \geq \mu/2 ] \leq 2 \exp(-2(\mu/2)^2 (t')^2 / (4t')) < 2 \exp(-\mu^2 t / 32).$$

In total, we conclude that

$$\Pr [ |f(x) - g(x)| \geq \mu ] < 2 \exp(-\mu^2 t / 8) + \exp(-t/16) + 2 \exp(-\mu^2 t / 32) < 5 \exp(-\mu^2 t / 32). \quad \square$$

**Restatement of Lemma 2.** For any  $x \in \mathcal{X}$ , any  $f \in \Delta(\mathcal{H})$  and any  $\mu \geq 1/t$ :

$$\Pr_{g \sim \mathcal{D}_{f,t}} [ |g(x)| \leq \mu ] \leq 2\mu\sqrt{t}.$$

*Proof.* Let  $h'_1, \dots, h'_t$  be the hypotheses sampled in the first step of drawing  $g$ . Define  $\sigma_i$  to be 1 if  $h'_i$  is sampled in  $g$  and  $-1$  otherwise. That is, we have

$$g(x) = \frac{1}{|\{i : \sigma_i = 1\}|} \sum_{i: \sigma_i = 1} h'_i(x).$$

Let  $\Gamma = \sum_{i=1}^t h'_i(x)$ . Then

$$\begin{aligned} & \Gamma + \sum_{i=1}^t \sigma_i h'_i(x) \\ &= \sum_{i: \sigma_i = 1} h'_i(x) + \sum_{i: \sigma_i = -1} h'_i(x) + \sum_{i=1}^t \sigma_i h'_i(x) \\ &= 2 \sum_{i: \sigma_i = 1} h'_i(x) = 2t' g(x). \end{aligned}$$

Therefore,  $|g(x)| \leq \mu$  if and only if

$$\left| \frac{\Gamma + \sum_i \sigma_i h'_i(x)}{2t'} \right| \leq \mu.$$

Since  $t' \leq t$ , this implies

$$\left| \frac{\Gamma + \sum_i \sigma_i h'_i(x)}{2t} \right| \leq \mu.$$

Hence, we have  $\Pr[|g(x)| \leq \mu] \leq \Pr[\sum_i \sigma_i h'_i(x) \in -\Gamma \pm 2t\mu]$ . By Erdős' improved Littlewood-Offord lemma, as long as  $2t\mu \geq 2$ , this happens with probability at most  $2t\mu \binom{t}{\lfloor t/2 \rfloor} 2^{-t}$ . The central binomial coefficient satisfies  $\binom{t}{\lfloor t/2 \rfloor} \leq 2^t / \sqrt{\pi t/2} \leq 2^t / \sqrt{t}$  and thus the probability is at most  $2t\mu / \sqrt{t} = 2\mu\sqrt{t}$ .  $\square$

Finally, we prove Lemma 3 from the main paper:

**Restatement of Lemma 3.** *For any distribution  $\mathcal{D}$  over  $\mathcal{X} \times \{-1, 1\}$ , any  $t \geq 36$  and any voting classifier  $f \in \Delta(\mathcal{H})$  for a hypothesis set  $\mathcal{H} \subset \mathcal{X} \rightarrow \{-1, 1\}$ , we have:*

$$\mathcal{L}_{\mathcal{D}}(f) \leq 3\mathcal{L}_{\mathcal{D}}^t(f).$$

For the proof, we first need the following auxiliary lemma:

**Lemma C.1.** *For any  $x \in \mathcal{X}$  and any  $f \in \Delta(\mathcal{H})$ , if  $f(x) \neq 0$ , then*

$$\Pr_{g \sim \mathcal{D}_{f,t}} [\text{sign}(f(x)) = \text{sign}(g(x))] \geq 1/2 - 1/\sqrt{t}.$$

*Proof.* If we condition on  $t'$ , then  $h_1, \dots, h_{t'}$  are i.i.d samples from  $\mathcal{D}_f$  and thus  $\Pr[\text{sign}(g(x)) = \text{sign}(f(x))] \geq \Pr[\text{sign}(g(x)) = -\text{sign}(f(x))]$ . We therefore have  $\Pr[\text{sign}(f(x)) = \text{sign}(g(x))] \geq \Pr[g(x) \neq 0]/2$ , regardless of  $t'$ . We thus only need to bound  $\Pr[g(x) \neq 0]$ . For this, Lemma 2 with  $\mu = 1/t$  implies  $\Pr[g(x) = 0] \leq 2/\sqrt{t}$ .  $\square$

Using this lemma, we can prove Lemma 3:

*Proof of Lemma 3 from the main paper.* Consider any example  $(x, y) \in \mathcal{X} \times \{-1, 1\}$  for which  $\Pr_{g \sim \mathcal{D}_{f,t}} [yg(x) \leq 0] < 1/2 - 1/\sqrt{t}$ . By Lemma C.1, it must be the case that  $\text{sign}(f(x)) = y$ . We therefore have by Markov's inequality:

$$\begin{aligned} \mathcal{L}_{\mathcal{D}}(f) &\leq \frac{\Pr_{(x,y) \sim \mathcal{D}} [\Pr_{g \sim \mathcal{D}_{f,t}} [yg(x) \leq 0] \geq 1/2 - 1/\sqrt{t}]}{\Pr_{(x,y) \sim \mathcal{D}} [\Pr_{g \sim \mathcal{D}_{f,t}} [yg(x) \leq 0] \geq 1/2 - 1/\sqrt{t}]} \\ &\leq \frac{\mathbb{E}_{(x,y) \sim \mathcal{D}} [\Pr_{g \sim \mathcal{D}_{f,t}} [yg(x) \leq 0]]}{1/2 - 1/\sqrt{t}} \\ &= \mathcal{L}_{\mathcal{D}}^t(f) / (1/2 - 1/\sqrt{t}) \\ &\leq 3\mathcal{L}_{\mathcal{D}}^t(f). \end{aligned} \quad \square$$

## C.2 Relating generalization error to the ghost set

In the following, we give the proof of Lemma 6 from the main paper:

**Restatement of Lemma 6.** *For  $m \geq 2400^2$  any  $t$  and any  $f$ , it holds that:*

$$\Pr_S \left[ \sup_{f \in \Delta(\mathcal{H})} |\mathcal{L}_S^t(f) - \mathcal{L}_{\mathcal{D}}^t(f)| > \frac{1}{1200} \right] \leq 2 \cdot \Pr_{S,S'} \left[ \sup_{f \in \Delta(\mathcal{H})} |\mathcal{L}_S^t(f) - \mathcal{L}_{S'}^t(f)| > \frac{1}{2400} \right].$$

*Proof.* The proof uses standard techniques uneventfully. We can assume  $\Pr_S [\sup_{f \in \Delta(\mathcal{H})} |\mathcal{L}_S^t(f) - \mathcal{L}_{\mathcal{D}}^t(f)| > 1/1200] > 0$ , otherwise we are done. We have:

$$\begin{aligned} &\Pr_{S,S'} \left[ \sup_{f \in \Delta(\mathcal{H})} |\mathcal{L}_S^t(f) - \mathcal{L}_{S'}^t(f)| > \frac{1}{2400} \right] \\ &\geq \Pr_{S,S'} \left[ \sup_{f \in \Delta(\mathcal{H})} |\mathcal{L}_S^t(f) - \mathcal{L}_{S'}^t(f)| > \frac{1}{2400} \wedge \sup_{f \in \Delta(\mathcal{H})} |\mathcal{L}_S^t(f) - \mathcal{L}_{\mathcal{D}}^t(f)| > \frac{1}{1200} \right] \\ &= \Pr_S \left[ \sup_{f \in \Delta(\mathcal{H})} |\mathcal{L}_S^t(f) - \mathcal{L}_{\mathcal{D}}^t(f)| > \frac{1}{1200} \right] \times \\ &\quad \Pr_{S,S'} \left[ \sup_{f \in \Delta(\mathcal{H})} |\mathcal{L}_S^t(f) - \mathcal{L}_{S'}^t(f)| > \frac{1}{2400} \mid \sup_{f \in \Delta(\mathcal{H})} |\mathcal{L}_S^t(f) - \mathcal{L}_{\mathcal{D}}^t(f)| > \frac{1}{1200} \right]. \end{aligned}$$



Fix a data set  $S$  in the non-empty event  $\sup_{f \in \Delta(\mathcal{H})} |\mathcal{L}_S^t(f) - \mathcal{L}_{\mathcal{D}}^t(f)| > 1/1200$ . Let  $f^* \in \mathcal{H}$  be any hypothesis on which  $|\mathcal{L}_S^t(f^*) - \mathcal{L}_{\mathcal{D}}^t(f^*)| > 1/1200$ . The hypothesis  $f^*$  does not depend on  $S'$  but only on  $S$ . We now condition on  $S$  as well and get:

$$\begin{aligned} & \Pr_{S, S'} \left[ \sup_{f \in \Delta(\mathcal{H})} |\mathcal{L}_S^t(f) - \mathcal{L}_{S'}^t(f)| > \frac{1}{2400} \mid S; \sup_{f \in \Delta(\mathcal{H})} |\mathcal{L}_S^t(f) - \mathcal{L}_{\mathcal{D}}^t(f)| > \frac{1}{1200} \right] \\ & \geq \Pr_{S'} \left[ |\mathcal{L}_S^t(f^*) - \mathcal{L}_{S'}^t(f^*)| > \frac{1}{2400} \mid S; \sup_{f \in \Delta(\mathcal{H})} |\mathcal{L}_S^t(f) - \mathcal{L}_{\mathcal{D}}^t(f)| > \frac{1}{1200} \right] \\ & \geq \Pr_{S'} \left[ |\mathcal{L}_{S'}^t(f^*) - \mathcal{L}_{\mathcal{D}}^t(f^*)| \leq \frac{1}{2400} \mid S; \sup_{f \in \Delta(\mathcal{H})} |\mathcal{L}_S^t(f) - \mathcal{L}_{\mathcal{D}}^t(f)| > \frac{1}{1200} \right]. \end{aligned}$$

Here the last inequality follows because the events  $|\mathcal{L}_{S'}^t(f^*) - \mathcal{L}_{\mathcal{D}}^t(f^*)| \leq 1/2400$  and  $|\mathcal{L}_S^t(f^*) - \mathcal{L}_{\mathcal{D}}^t(f^*)| > 1/1200$  (which holds by definition of  $f^*$ ) implies  $|\mathcal{L}_S^t(f^*) - \mathcal{L}_{S'}^t(f^*)| > 1/2400$ . Since  $f^*$  is fixed and independent of  $S'$ , we may now use Hoeffding's inequality to conclude

$$\Pr_{S'} \left[ |\mathcal{L}_{S'}^t(f^*) - \mathcal{L}_{\mathcal{D}}^t(f^*)| \leq 1/2400 \mid S; \sup_{f \in \Delta(\mathcal{H})} |\mathcal{L}_S^t(f) - \mathcal{L}_{\mathcal{D}}^t(f)| > 1/1200 \right] \geq 1 - 2e^{-2(1/2400)^2 m}.$$

For  $m \geq 2400^2$ , this is at least  $1 - 2e^{-2} \geq 1/2$ .

Multiplying with  $\Pr[S \mid \sup_{f \in \Delta(\mathcal{H})} |\mathcal{L}_S^t(f) - \mathcal{L}_{\mathcal{D}}^t(f)| > 1/1200]$  and integrating over  $S$ , we get

$$\begin{aligned} & \int_S \left( \Pr_{S'} \left[ \sup_{f \in \Delta(\mathcal{H})} |\mathcal{L}_S^t(f) - \mathcal{L}_{S'}^t(f)| > \frac{1}{2400} \mid S; \sup_{f \in \Delta(\mathcal{H})} |\mathcal{L}_S^t(f) - \mathcal{L}_{\mathcal{D}}^t(f)| > \frac{1}{1200} \right] \right. \\ & \quad \left. \times \Pr \left[ S \mid \sup_{f \in \Delta(\mathcal{H})} |\mathcal{L}_S^t(f) - \mathcal{L}_{\mathcal{D}}^t(f)| > \frac{1}{1200} \right] \right) \\ & \geq \int_S \frac{1}{2} \Pr \left[ S \mid \sup_{f \in \Delta(\mathcal{H})} |\mathcal{L}_S^t(f) - \mathcal{L}_{\mathcal{D}}^t(f)| > \frac{1}{1200} \right]. \end{aligned}$$

The right hand side is simply  $1/2$  and the left hand side is  $\Pr_{S, S'}[\sup_{f \in \Delta(\mathcal{H})} |\mathcal{L}_S^t(f) - \mathcal{L}_{S'}^t(f)| > 1/2400 \mid \sup_{f \in \Delta(\mathcal{H})} |\mathcal{L}_S^t(f) - \mathcal{L}_{\mathcal{D}}^t(f)| > 1/1200]$ . We finally conclude that for  $m \geq 2400^2$ , we have:

$$\Pr_{S, S'} \left[ \sup_{f \in \Delta(\mathcal{H})} |\mathcal{L}_S^t(f) - \mathcal{L}_{S'}^t(f)| > \frac{1}{2400} \right] \geq \frac{1}{2} \Pr \left[ \sup_{f \in \Delta(\mathcal{H})} |\mathcal{L}_S^t(f) - \mathcal{L}_{\mathcal{D}}^t(f)| > \frac{1}{1200} \right]. \quad \square$$

### C.3 Relation to the growth function

Last, we prove Lemma 8 from the main paper, which is restated here for convenience:

**Restatement of Lemma 8.** *For any  $0 < \delta < 1$ , every  $t$ , and every  $\mu \leq \delta/(9600\sqrt{t})$ , we have*

$$\Pr_{S, S'} \left[ \sup_{f \in \Delta(\mathcal{H})} |\mathcal{L}_S^t(f) - \mathcal{L}_{S'}^t(f)| > \frac{1}{2400} \right] \leq \sup_P 2 |\hat{\Delta}_\delta^t(P)| \exp(-2m/9600^2).$$

*Proof.* Let  $\mu \leq \delta/(9600\sqrt{t})$ . We have that:

$$\begin{aligned} & \Pr_{S, S'} \left[ \sup_{f \in \Delta(\mathcal{H})} |\mathcal{L}_S^t(f) - \mathcal{L}_{S'}^t(f)| > \frac{1}{2400} \right] \\ & = \int_P \Pr[P] \Pr_{S, S'} \left[ \sup_{f \in \Delta(\mathcal{H})} |\mathcal{L}_S^t(f) - \mathcal{L}_{S'}^t(f)| > \frac{1}{2400} \mid P \right] \\ & \leq \sup_P \Pr \left[ \sup_{f \in \Delta(\mathcal{H})} |\mathcal{L}_S^t(f) - \mathcal{L}_{S'}^t(f)| > \frac{1}{2400} \mid P \right] \\ & = \sup_P \Pr \left[ \sup_{f \in \Delta(\mathcal{H})} \left| \Pr_{(x, y) \sim S, g \sim \mathcal{D}_{f, t}} [yg(x) \leq 0] - \Pr_{(x, y) \sim S', g \sim \mathcal{D}_{f, t}} [yg(x) \leq 0] \right| > \frac{1}{2400} \mid P \right] \\ & = \sup_P \Pr \left[ \sup_{f \in \Delta(\mathcal{H})} \left| \int_g \Pr[g] \left( \Pr_{(x, y) \sim S} [yg(x) \leq 0] - \Pr_{(x, y) \sim S'} [yg(x) \leq 0] \right) \right| > \frac{1}{2400} \mid P \right]. \end{aligned}$$

We always have  $(\Pr_{(x,y)\sim S}[yg(x) \leq 0] - \Pr_{(x,y)\sim S'}[yg(x) \leq 0]) \leq 1$ , and by Lemma 13, we have  $\Pr[g \notin \Delta_\delta^\mu(\mathcal{H}, P)] \leq 1/4800$ , hence

$$\begin{aligned} & \left| \int_g \Pr[g] \left( \Pr_{(x,y)\sim S}[yg(x) \leq 0] - \Pr_{(x,y)\sim S'}[yg(x) \leq 0] \right) \right| \\ & \leq \Pr_{g \sim \mathcal{D}_{f,g}} [g \notin \Delta_\delta^\mu(\mathcal{H}, P)] + \sup_{g \in \Delta_\delta^\mu(\mathcal{H}, P)} \left| \Pr_{(x,y)\sim S}[yg(x) \leq 0] - \Pr_{(x,y)\sim S'}[yg(x) \leq 0] \right| \\ & \leq \frac{1}{4800} + \sup_{g \in \Delta_\delta^\mu(\mathcal{H}, P)} \left| \Pr_{(x,y)\sim S}[yg(x) \leq 0] - \Pr_{(x,y)\sim S'}[yg(x) \leq 0] \right|. \end{aligned}$$

We thus have

$$\begin{aligned} & \Pr_{S,S'} \left[ \sup_{f \in \Delta(\mathcal{H})} |\mathcal{L}_S^t(f) - \mathcal{L}_{S'}^t(f)| > \frac{1}{2400} \right] \\ & \leq \sup_P \Pr_{S,S'} \left[ \frac{1}{4800} + \sup_{g \in \Delta_\delta^\mu(\mathcal{H}, P)} \left| \Pr_{(x,y)\sim S}[yg(x) \leq 0] - \Pr_{(x,y)\sim S'}[yg(x) \leq 0] \right| > \frac{1}{2400} \mid P \right] \\ & = \sup_P \Pr_{S,S'} \left[ \sup_{g \in \Delta_\delta^\mu(\mathcal{H}, P)} \left| \Pr_{(x,y)\sim S}[yg(x) \leq 0] - \Pr_{(x,y)\sim S'}[yg(x) \leq 0] \right| > \frac{1}{4800} \mid P \right]. \end{aligned}$$

To bound this, let  $\hat{\Delta}_\delta^\mu(P) = \text{sign}(\Delta_\delta^\mu(\mathcal{H}, P))$ . Then the above equals:

$$\sup_P \Pr_{S,S'} \left[ \sup_{h \in \hat{\Delta}_\delta^\mu(P)} \left| \Pr_{(x,y)\sim S}[h(x) \neq y] - \Pr_{(x,y)\sim S'}[h(x) \neq y] \right| > \frac{1}{4800} \mid P \right].$$

Since we have restricted to the fixed set  $P$ , the set  $\hat{\Delta}_\delta^\mu(P)$  is finite. Hence we may use the union bound to bound the above by

$$\sup_P |\hat{\Delta}_\delta^\mu(P)| \sup_{h \in \hat{\Delta}_\delta^\mu(P)} \Pr_{S,S'} \left[ \left| \Pr_{(x,y)\sim S}[h(x) \neq y] - \Pr_{(x,y)\sim S'}[h(x) \neq y] \right| > \frac{1}{4800} \mid P \right].$$

For a set  $P$  and hypothesis  $h \in \hat{\Delta}_\delta^\mu(P)$ , let  $p$  denote the fraction of samples  $(x, y) \in P$  for which  $h(x) \neq y$ . Recall that  $S$  and the ghost set  $S'$  are obtained from  $P$  by letting  $S$  be a uniform set of  $m$  samples from  $P$  without replacement, and  $S'$  are the remaining  $m$  samples. For shorthand, define  $p_S = \Pr_{(x,y)\sim S}[h(x) \neq y \mid P]$  and  $p_{S'}$  symmetrically. Then  $p = (1/2)(p_S + p_{S'})$ . By Hoeffding's inequality for sampling without replacement, we have  $\Pr_{S,S'}[|p_S - p| > \varepsilon \mid P] = \Pr_S[|p_S - p| > \varepsilon \mid P] < 2 \exp(-2\varepsilon^2 m)$ . Setting  $\varepsilon = 1/9600$ , we get that for  $|p - p_S| \leq 1/9600$ , it must be the case that  $p_{S'} = 2p - p_S \in p \pm 1/9600$ . Hence  $|p_S - p_{S'}| \leq 1/4800$  and we conclude  $\Pr_{S,S'}[|p_S - p_{S'}| > 1/4800 \mid P] < 2 \exp(-2m/9600^2)$ . Thus, we end up with the bound

$$\Pr_{S,S'} \left[ \sup_{f \in \Delta(\mathcal{H})} |\mathcal{L}_S^t(f) - \mathcal{L}_{S'}^t(f)| > \frac{1}{2400} \right] \leq \sup_P 2|\hat{\Delta}_\delta^\mu(P)| \exp(-2m/9600^2). \quad \square$$
